# Supplementary material for: Heteronuclear and homonuclear radio-frequency-driven recoupling
Source: PubMed Central journal article supplement (PMC10539778; doi:10.5194/mr-2-343-2021), 2021-05-28
Supplement: mr-2-343-supplement.pdf [file mr-2-343-supplement.pdf]

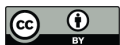

*Supplement of*

## **Heteronuclear and homonuclear radio-frequency-driven recoupling**

**Evgeny Nimerovsky et al.**

*Correspondence to:* Loren B. Andreas ([land@nmr.mpibpc.mpg.de](mailto:land@nmr.mpibpc.mpg.de)) and Evgeny Nimerovsky ([evni@nmr.mpibpc.mpg.de](mailto:evni@nmr.mpibpc.mpg.de))

The copyright of individual parts of the supplement might differ from the article licence.

1 The Supplement consists of four sections. In the first section, “1D HET-RFDR Experiments” we show  
 2 additional 1D  $^1\text{H}$ - $^{13}\text{C}$  HET-RFDR spectra. The second “HET-RFDR Simulations” section provides  
 3 additional HET-RFDR simulations, which were performed under conditions that closely match the  
 4 experiments. The third section, “Operator Paths” shows the possible paths of RFDR and HET-RFDR  
 5 transfers via heteronuclear and homonuclear operators during the first two rotor periods. The last part,  
 6 “RFDR Phase Cycling”, shows the formal proof of zero signal transfer for a homonuclear  $I_2$  spin system  
 7 with zero offset difference and when all  $\pi$ -pulses have the same phase.

### 8 **1D HET-RFDR Experiments**

9 Figure S1 shows a 1D HET-RFDR pulse sequence. The sequence consists of two  $\pi/2$ -pulses on  
 10 the  $^1\text{H}$  channel (with two step phase cycling to eliminate the signal from directly excited spins of carbons)  
 11 followed by a series of HET-RFDR pulses and finally a  $\pi/2$ -pulse and detection on the  $^{13}\text{C}$  channel. The  
 12 evolution of the magnetization from proton to carbon spins through the HET-RFDR pulse sequence  
 13 (Figure S1) can be described with cartesian operators as follows:

$$\begin{aligned}
 & H_z \xrightarrow{\text{first proton } \left(\frac{\pi}{2}\right)_x \text{ pulse}} -H_y \xrightarrow{\text{second proton } \left(\frac{\pi}{2}\right)_{\mp x} \text{ pulse}} \pm H_z \\
 & \xrightarrow{\text{HET-RFDR block}} \pm a_{HC}(t_{mix}) C_z \xrightarrow{\text{first carbon } \left(\frac{\pi}{2}\right)_x \text{ pulse}} \mp a_{HC}(t_{mix}) C_y \xrightarrow{\text{detection}_{\pm x}} -a_{HC}(t_{mix}), \quad \text{Eq. (S1)}
 \end{aligned}$$

16 where,  $a_{HC}(t_{mix})$ , is an amplitude of the transferred signal.

## 1D HET-RFDR

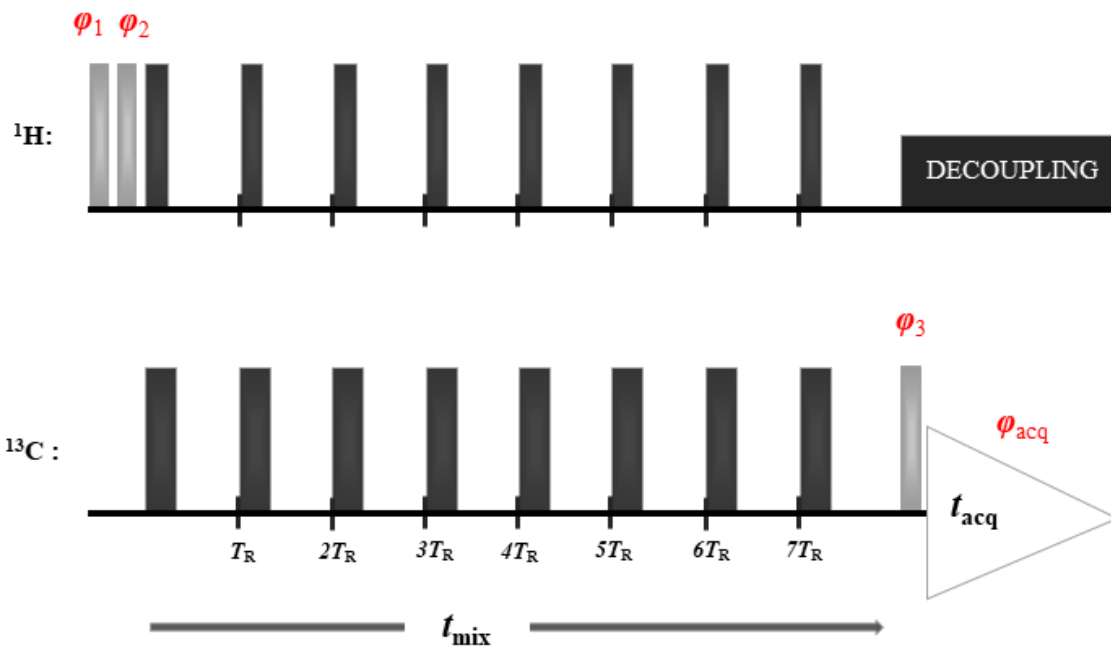

17

18 **Figure S1** 1D HET-RFDR pulse sequence. The sequence consists of two  $\pi/2$ -pulses on the  $^1\text{H}$  channel, HET-RFDR blocks ( a  
 19 train of  $\pi$ -pulses with a single pulse during each rotor period applied on both channels),  $\pi/2$ -pulse on the  $^{13}\text{C}$  channel and  
 20 detection with proton decoupling. The phases of the  $\pi/2$ -pulses are  $\varphi_1 = x$ ;  $\varphi_2 = -x, x$ ;  $\varphi_3 = -x, -x, x, x, y, y, -y, -y$ .  $\varphi_{\text{acq}} =$   
 21  $x, -x, -x, x, -y, y, y, -y$ .  $\pi$ -pulses on the both channels follow the XY8 scheme (Gullion et al., 1990). During acquisition, SWH-  
 22 TPPM (Thakur et al., 2006) at 55.555 kHz or SPINAL64 (Fung et al., 2000) at 10 kHz decoupling is applied on the proton  
 23 channel to narrow the detected resonances.

24 Figures. S2-S3 demonstrate 1D HC HET-RFDR spectra using [ $^{13}\text{C}$ ,  $^{15}\text{N}$ ] labeled SH3. On proton  
 25 and carbon channels  $\pi$ -pulses with different lengths were applied: 3.4 us (147 kHz) and 5 us (100 kHz),  
 26 respectively. Figure S2a shows HC spectra under different mixing times: 0.576 ms, 1.728 ms, 2.888 ms,  
 27 4.032 ms, 5.184 ms and 6.336 ms. Figure S2b shows HC spectra, which were obtained with 6.336 ms  
 28 HET-RFDR (blue) and RFDR (cyan,  $\pi$ -pulses were applied on carbon channel only) . As expected, HET-  
 29 RFDR provides  $^1\text{H}$  to  $^{13}\text{C}$  transfer. The efficiency depends on the spectral region. For some aromatic  
 30 carbons, the transfer achieves  $\sim 100\%$  efficiency with respect to CP at 1.5 ms (Figure S2b, red), but for  
 31 other regions, like  $\text{C}\alpha$ , the polarization transfer is  $\sim 50\%$ .

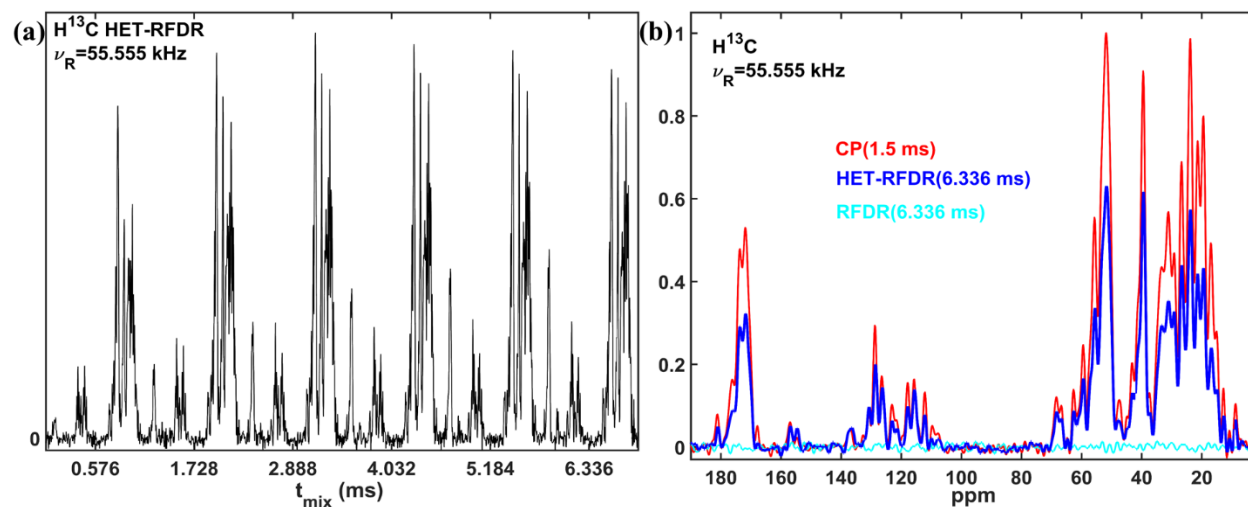

32

33 **Figure S2** 1D HC [ $^{13}\text{C}$ ,  $^{15}\text{N}$ ] labeled SH3 spectra at 55.555 kHz (a) HET-RFDR spectra with different mixing times: 0.576 ms,  
 34 1.728 ms, 2.888 ms, 4.032 ms, 5.184 ms, 6.336 ms. (b) Comparison of 1D HC CP spectrum (red, 1.5 ms of CP mixing) and  
 35 HET-RFDR spectrum (blue, 6.336 ms of HET-RFDR mixing). The cyan spectrum shows a HC RFDR spectrum, for which  $\pi$ -  
 36 pulses were applied only on the  $^{13}\text{C}$  channel. The carbon reference frequency was set up on 40 ppm. The MAS rate was 55.555  
 37 kHz. The experimental parameters are shown in Table S1.

38 The transfer of the magnetization from  $H_z$  operators to  $C_z$  operators is minimally affected by flip  
 39 angle deviations, since XY8 phase cycling is used (Gullion et al., 1990). To show this, we recorded  
 40 additional 1D HC HET-RFDR spectra with a series of flip angles on the carbon channel. (Figure S3).

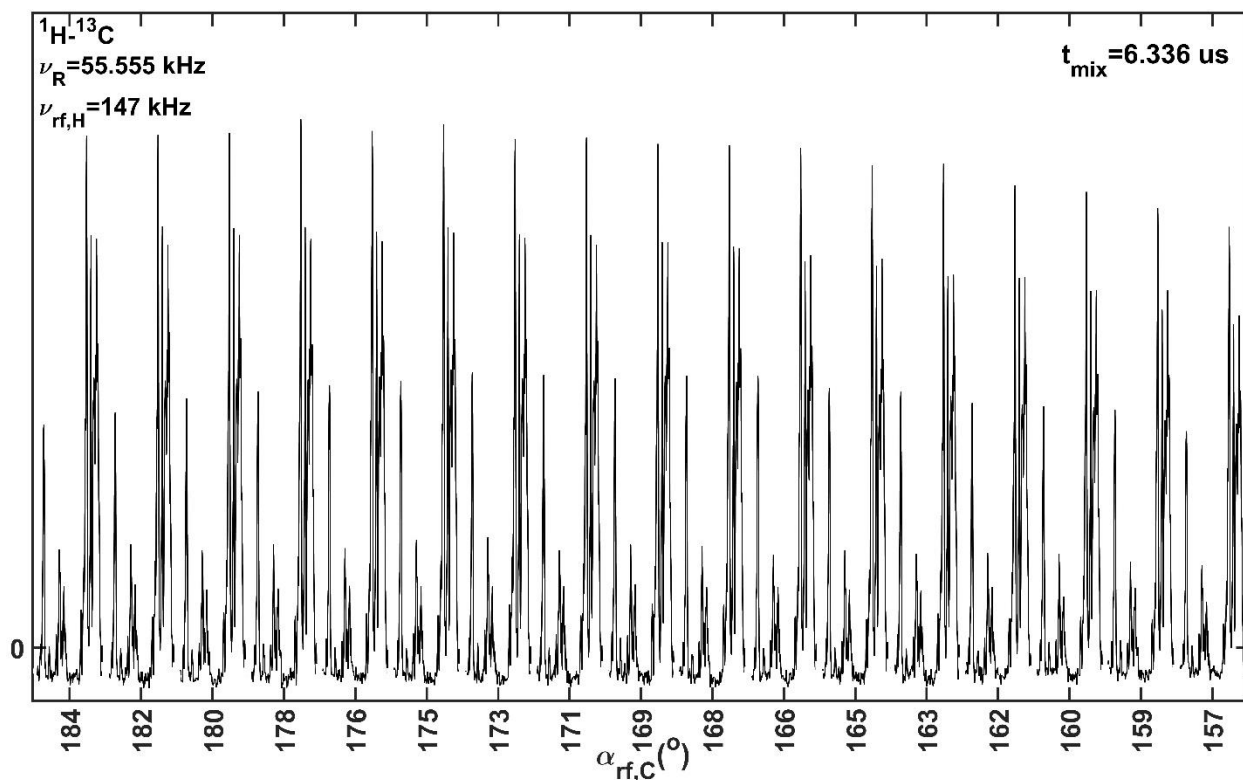

41

42 Figure S3 1D proton-carbon HET-RFDR spectra of [<sup>13</sup>C, <sup>15</sup>N] labeled SH3 with a 6.336 ms transfer time as a function of the  
 43 flip angle of the pulses on the carbon channel between 157.34° and 184.64° (17 spectra). The width of  $\pi$ -pulses on the proton  
 44 channel was 3.4  $\mu$ s. The width of the applied pulses on the carbon channel was constant and equal to 5  $\mu$ s. 55.555 kHz MAS was  
 45 used. The rf-field values in kHz on the carbon channel from left to right were: 87.41, 88.2, 89.01, 89.83, 90.66, 91.51, 92.38,  
 46 93.26, 94.16, 95.08, 96.02, 96.97, 97.94, 98.94, 99.95, 100.98, 102.04.

47 *Solid state NMR spectroscopy:* The CP and HET-RFDR spectra of <sup>13</sup>C,<sup>15</sup>N SH3 were acquired at 14.1 T  
 48 (600 MHz) using a Bruker AVIIIHD spectrometer using a MASDVT600W2 BL1.3 HXY probe. The  
 49 experiments were performed at 55.555 kHz MAS with the temperature of the cooling gas set to 235 K.

50 For 1D <sup>1</sup>H<sup>13</sup>C spectra during the HET-RFDR periods, the widths of pulses on proton and carbon channels  
 51 were 3.4  $\mu$ s and 5  $\mu$ s, respectively. 13.89 kHz SW<sub>f</sub>-TPPM (Thakur et al., 2006) with 36  $\mu$ s pulses was used  
 52 during the acquisition. Table S1 summarizes the applied experimental parameters.

53 **Table S1** Summary of the experimental parameters used in the CP (the start and the end values are shown) and HET-RFDR H<sup>13</sup>C  
 54 [<sup>13</sup>C,<sup>15</sup>N] SH3 experiments.

|                       | CP      | HET-RFDR            |
|-----------------------|---------|---------------------|
| $^1\text{H}$ (kHz)    | 92-115  | 147                 |
| $^{13}\text{C}$ (kHz) | 43      | 100, [87.41-102.04] |
| transfer time (ms)    | 1.5     | [0.576-6.336]       |
| NS                    | 48      | 48                  |
| D1 (s)                | 1.5     | 1.5                 |
| AQ (s)                | 0.01536 | 0.01536             |
| SW (kHz)              | 50      | 50                  |

55 NS – number of scans; D1 – a recycle delay; AQ – the acquisition time; SW – the spectral width.

## 56 HET-RFDR Simulations

57 Figure S4 shows simulated HET-RFDR polarization transfers for four ( $S_2I_2$ , Figure S4a) and three ( $SI_2$ ,  
58 Figure S4b) spin systems with conditions that closely match the experiments: 55.555 kHz MAS and 5.4  
59  $\mu\text{s}$   $\pi$ -pulses.

60 Figure S4a shows the HET-RFDR polarization transfers between a directly bonded spin pair ( $I_1$ - $C_2$ , solid  
61 lines) and the remote pair ( $I_1$ - $C_3$ , lines with circles). The lines with diamonds represent signals that are not  
62 transferred, but remain on the spin  $I_1$ . We consider three cases: rigid  $C_2H_2$  chain (black lines), dynamic  
63  $C_2H_2$  chain (red lines) and rigid  $N_2C_2$  chain (blue lines). For the rigid (black solid line) and dynamic (red  
64 solid line)  $C_2H_2$  chains when the heteronuclear dipolar coupling constants are larger than the homonuclear  
65 dipolar constants, the polarization transfer from  $H_1$  to  $C_2$  oscillates about ~35% efficiency. However, for  
66 the spin system with the weak heteronuclear dipolar coupling constants (blue lines), the HET fp-RFDR  
67 polarization transfer between directly bonded spins is lower (blue solid line) and achieves only ~20%  
68 transfer efficiency.

69 The signal that remains on the starting spin (lines with diamonds) are ~40% for first two cases (black and  
70 solid lines with diamonds) and ~70% for weak dipolar coupling constants (blue line with diamonds).

71 The HET-RFDR transfer between remote spins, e.g.  $H_1$  and  $C_3$  are about ~10% of the initial polarization  
72 for all these three cases (black, red and blue lines with circles). The transfer of magnetization mostly  
73 occurs via relayed transfer ( $I_1$ - $C_2$ - $C_3$ ) and not directly from  $I_1$  to  $C_3$ , which more clearly can be seen in the  
74 simulations on Figure S4b

75 Figure S4b considers the HET-RFDR polarization transfer between directly bonded spins ( $N_1$ - $H_2$ , solid  
 76 lines) and remote pair ( $N_1$ - $H_3$ , lines with circles). The heteronuclear dipolar coupling constant between  $N_1$   
 77 to  $H_2$  spins is kept constant and the homonuclear dipolar constant between  $H_2$  and  $H_3$  is changed. When  
 78 the distance between  $H_2$  and  $H_3$  spins is 6 Å (green lines), the fp-RFDR polarization transfer between  $N_1$   
 79 and  $H_2$  achieves the maximal transfer of about 50% (solid green line). The direct HET-RFDR polarization  
 80 transfer efficiency between  $N_1$  and  $H_3$  is very low (green line with circles). For the  $H_2$  -  $H_3$  distances of 4  
 81 Å (blue line with circles), 3 Å (red line with circles) and 2 Å (black line with circles), the polarization  
 82 transfer between  $N_1$  and  $H_3$  achieves ~10%. Since the distance between  $N_1$  and  $H_3$  is not changed, the  
 83 transfer between  $N_1$  and  $H_3$  is achieved via sequential relayed transfer,  $N_1$ - $H_2$ - $H_3$ . The homonuclear  
 84 distance also has influence on the HET-RFDR polarization transfer. With decreased  $H_2$ - $H_3$  distance the  
 85 amplitude of the HET-RFDR polarization transfer between directly bonded spins (solid lines) is decreased.

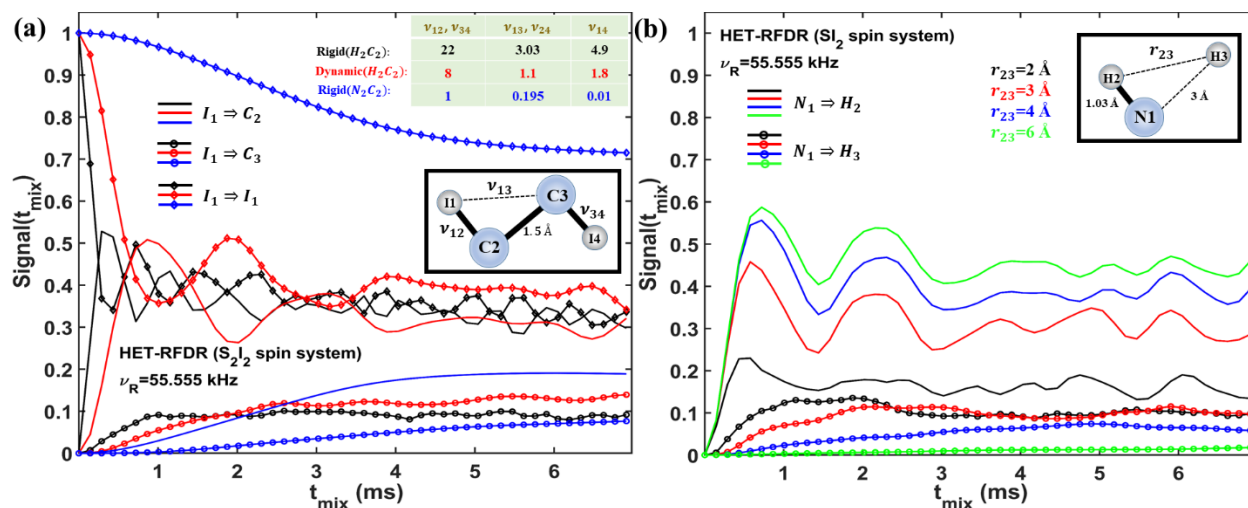

86  
 87 **Figure S4** Simulated HET-RFDR signals. The simulated HET-RFDR polarization transfers for  $S_2I_2$  (a) and  $SI_2$  (b) spin systems  
 88 are shown as a function of mixing time. For all simulations MAS was 55.555 kHz and hard  $\pi$ -pulses with 5.4 us width (92.59  
 89 kHz rf-field) were applied simultaneously every rotor period. The offset and CSA values (the offset and CSA values are defined  
 90 in the same way as in (Bak et al., 2000)) of spins [ $I_1;C_2;C_3;I_4$ ] are [1;2;5.5;6] (kHz) and [4;1;2;3] (kHz), respectively. The initial  
 91 and the final operators were in the direction  $\hat{z}$ . (a) The solid lines represent the HET-RFDR polarization transfers between  $I_1$  and  
 92  $C_2$  spins; the lines with circles represent the HET-RFDR polarization transfers between  $I_1$  and  $C_3$  spins and the lines with  
 93 diamonds represent the decay of starting signals. The carbon-carbon distance as well as the dipolar coupling constant between  $C_2$

94 and  $C_3$  were kept unchanged at  $1.5 \text{ \AA}$  ( $2.22 \text{ kHz}$ ). The black lines represent the rigid  $H_2C_2$  spin system (with  $I_1, I_4$  of the inset as  
95 protons). The proton-carbon dipolar coupling constants were:  $\nu_{12} = \nu_{34} = 22 \text{ kHz}$ ;  $\nu_{13} = \nu_{34} = 3.03 \text{ kHz}$  and the proton-proton  
96 coupling constant was:  $\nu_{14} = 4.9 \text{ kHz}$ . The red lines represent the dynamic  $H_2C_2$  spin system with reduced proton-carbon  
97 couplings of are:  $\nu_{12} = \nu_{34} = 8 \text{ kHz}$ ;  $\nu_{13} = \nu_{34} = 1.01 \text{ kHz}$  and a reduced proton-proton coupling  $\nu_{14} = 1.8 \text{ kHz}$ . The blue  
98 lines represent the rigid  $N_2C_2$  spin system (with  $I_1, I_4$  of the inset as nitrogens). The nitrogen-carbon dipolar coupling constants  
99 are:  $\nu_{12} = \nu_{34} = 1 \text{ kHz}$ ;  $\nu_{13} = \nu_{34} = 0.195 \text{ kHz}$  and for the nitrogen-nitrogen coupling,  $\nu_{14} = 0.01 \text{ kHz}$ . (b) The solid lines  
100 represent the HET-RFDR polarization transfer between  $N_1$  and  $H_2$  spins with unchanged dipolar coupling constant of  $11 \text{ kHz}$ .  
101 The lines with circles represent the transfer between  $N_1$  and  $H_3$  spins for different distances (dipolar coupling constants) between  
102  $H_2$  and  $H_3$  spins: black lines –  $2 \text{ \AA}$  ( $15 \text{ kHz}$ ), red lines –  $3 \text{ \AA}$  ( $4.4 \text{ kHz}$ ), blue lines –  $4 \text{ \AA}$  ( $1.9 \text{ kHz}$ ) and green lines –  $6 \text{ \AA}$  ( $0.5 \text{ kHz}$ ).  
103 The distance as well as the dipolar coupling constant between  $N_1$  and  $H_3$  were kept unchanged at  $3 \text{ \AA}$  and  $0.45 \text{ kHz}$ . XY8 phase  
104 cycling was used.

105 Figure S5 demonstrates the simulated HET-RFDR transferred signals for three different spin  
106 systems (two, three and four spin systems) with similar offset values as in the experiment ( $\Omega_H \approx 0 \text{ kHz}$   
107 and  $\Omega_C \approx 5 \text{ kHz}$ , Figure 3f in the main text). In all cases the initial operator was  $I_z$  and the measured  
108 operator was  $S_{z1}$ . For the two spin system ( $SI$ , black line), the HET-RFDR polarization transfer is  
109 negligible. However, for three spins ( $IS_2$ , red line) and four spins ( $IS_3$ , blue line) the transferred  
110 polarization reaches a negative value of  $-0.05$ . This suggests the involvement of three or more spins in the  
111 transfer, but without a more detailed investigation, it is not immediately obvious via which operators the  
112 signal is transferred.



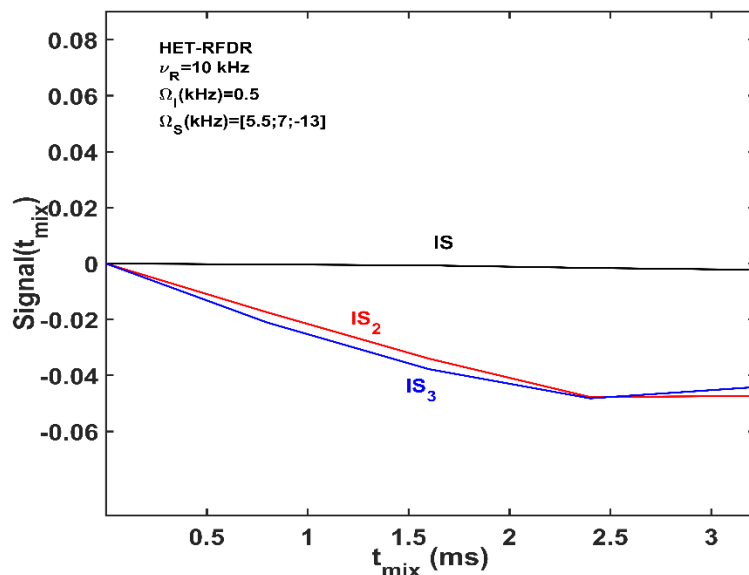

113  
 114 **Fig. S5** The simulated HET-RFDR signals. The simulated HET-RFDR polarization transfers for  $IS$  (black)  $IS_2$  (red) and  $IS_3$   
 115 (blue) spin systems as a function of the mixing time. For all simulations, MAS was 10 kHz and hard  $\pi$ -pulses with 5.8 us and 6.6  
 116 us widths were applied simultaneously on  $I$  and  $S_n$  spins every rotor period. The offset and dipolar coupling constants in kHz:  $IS$   
 117 -  $[\Omega_I; \Omega_{S1}] = [0.5; 5.5]$ ,  $[v_{D,IS1}] = [23]$ ;  $IS_2$  -  $[\Omega_I; \Omega_{S1}; \Omega_{S2}] = [0.5; 5.5; 7]$ ,  $[v_{D,IS1}; v_{D,IS2}; v_{D,S1S2}] = [23; 3.4; 2.5]$ ;  $IS_3$  -  
 118  $[\Omega_I; \Omega_{S1}; \Omega_{S2}; \Omega_{S3}] = [0.5; 5.5; 7; -13]$ ,  $[v_{D,IS1}; v_{D,IS2}; v_{D,IS3}; v_{D,S1S2}; v_{D,S1S3}] = [23; 3.4; 3.2; 2.5; 2.5]$ . In all simulations the  
 119 initial and the measured operators were  $I_z$  and  $S_{z1}$ , respectively. XY8 phase cycling was used.

## 120 Operator Paths

121 In this section we identify the paths via which the signals are transferred from  $I_z$  to  $S_z$  operators  
 122 and from  $I_{z1}$  to  $I_{z2}$  operators during the first two rotor periods of HET-RFDR and RFDR blocks,  
 123 respectively. The simulated parameters were used as in Figure 5a and b. Therefore, these Figures are  
 124 shown also here as Figure S6.

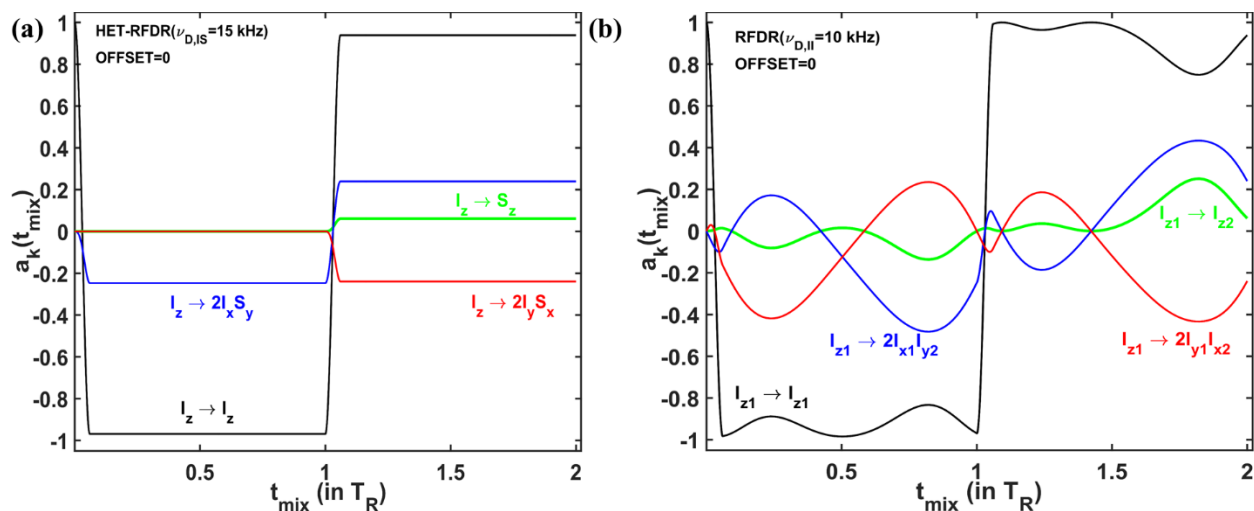

125  
 126 **Figure S6** The operator evolution through HET-RFDR and RFDR over two rotor periods. The simulated amplitudes of the  
 127 operators of a single crystal (Euler angles: 184°; 141°; 349°) for HET-RFDR (a) and RFDR (b). For the heteronuclear  $IS$  spin  
 128 system, ( $\nu_{D,IS} = 15$  kHz, the initial operator is  $I_z$ ) and for the homonuclear  $I_2$  spin system, ( $\nu_{D,II} = 10$  kHz, the initial operator is  
 129  $I_{z1}$ ). The MAS frequency was 10 kHz and the rf-field was 83 kHz. Black lines –  $I_z$  and  $I_{z1}$ ; Green lines –  $S_z$  and  $I_{z2}$ ; Blue lines –  
 130  $2I_xS_y$  and  $2I_{x1}I_{y2}$ ; Red lines –  $2I_yS_x$  and  $2I_{y1}I_{x2}$ .

131 We consider the amplitudes of the operators that are generated as a result of the evolution of the  
 132 other operators through pulses or delays:  $t(\pi_x) \rightarrow del_1 \rightarrow t(\pi_y) \rightarrow del_2$ . We first consider the  
 133 heteronuclear case of an  $IS$  spin system during HET-RFDR. Table S2 consists of four subsections. The  
 134 first, second, third and fourth subsections represent the amplitudes of four operators,  $I_z$ ,  $S_z$ ,  $2I_xS_y$ ,  $2I_yS_x$ ,  
 135 measured at four points.

136 **Table S2** Transfer paths during HET-RFDR. The single crystal amplitudes (Euler angles: 184°; 141°; 349°) of the operators at  
 137 four time points:  $\pi_x$  – the end of the first pulse;  $del_1$  – the end of the first delay;  $\pi_y$  – the end of the second pulse;  $del_2$  – in the  
 138 end of the second delay. The first column shows the initial operators. The first, second, third and fourth subsections represent the  
 139 amplitudes with the initial operators  $I_z$ ,  $S_z$ ,  $2I_xS_y$ ,  $2I_yS_x$ , respectively. The used simulated parameters were as in Figure S6a and in  
 140 Figure 5a in the main text.

| Op    | $I_z$   |         |         |         | $S_z$   |         |         |         | $2I_xS_y$ |         |         |         | $2I_yS_x$ |         |         |         |
|-------|---------|---------|---------|---------|---------|---------|---------|---------|-----------|---------|---------|---------|-----------|---------|---------|---------|
|       | $\pi_x$ | $del_1$ | $\pi_y$ | $del_2$ | $\pi_x$ | $del_1$ | $\pi_y$ | $del_2$ | $\pi_x$   | $del_1$ | $\pi_y$ | $del_2$ | $\pi_x$   | $del_1$ | $\pi_y$ | $del_2$ |
| $I_z$ | -       | 1       | -       | 1       | 0       | 0       | 0       | 0       | 0.25      | 0       | 0       | 0       | 0         | 0       | -       | 0       |
| $S_z$ | 0       | 0       | 0       | 0       | -       | 1       | -       | 1       | 0         | 0       | -       | 0       | 0.25      | 0       | 0       | 0       |

|           |      |   |      |   |      |   |      |   |      |   |      |   |      |   |      |   |
|-----------|------|---|------|---|------|---|------|---|------|---|------|---|------|---|------|---|
| $2I_xS_y$ | -    | 0 | 0    | 0 | 0    | 0 | 0.25 | 0 | -    | 1 | -    | 1 | 0    | 0 | 0    | 0 |
|           | 0.25 |   |      |   |      |   |      |   | 0.97 |   | 0.97 |   |      |   |      |   |
| $2I_yS_x$ | 0    | 0 | 0.25 | 0 | -    | 0 | 0    | 0 | 0    | 0 | 0    | 0 | -    | 1 | -    | 1 |
|           |      |   |      |   | 0.25 |   |      |   |      |   |      |   | 0.97 |   | 0.97 |   |

141

142 For example, the path  $I_z \xrightarrow{\pi_x} I_z \xrightarrow{del_1} I_z \xrightarrow{\pi_y} I_z \xrightarrow{del_2} I_z$  gives the amplitude of  $-0.97 \cdot 1 \cdot (-0.97) \cdot 1 =$

143 **0.94** (the bold font in the Table S2), which equals the amplitude of the  $I_z$  operator at the end of  $2T_R$  in

144 Figure S5a in the main text (black line). The path  $I_z \xrightarrow{\pi_x} I_z \xrightarrow{del_1} I_z \xrightarrow{\pi_y} I_z \xrightarrow{del_2} S_z$  gives the amplitude of

145  $-0.97 \cdot 1 \cdot (-0.97) \cdot 0 = 0$ . If we analyze all 64 possibilities, we find only one heteronuclear path,

146 connecting  $I_z$  and  $S_z$  operators through the first two rotor periods of HET-RFDR:  $I_z$

147  $\xrightarrow{\pi_x} 2I_xS_y \xrightarrow{del_1} 2I_xS_y \xrightarrow{\pi_y} S_z \xrightarrow{del_2} S_z$  with nonzero amplitude of  $-0.2472 \cdot 1 \cdot (-0.2472) \cdot 1 = 0.061$ .

148 In the same way we tabulate the homonuclear  $I_2$  spin system during the first two rotor periods of

149 RFDR block in Table S3.

150 **Table S3** Transfer paths during RFDR. The single crystal amplitudes (Euler angles:  $184^\circ$ ;  $141^\circ$ ;  $349^\circ$ ) of the operators at four

151 time points:  $\pi_x$  – the end of the first pulse;  $del_1$  – the end of the first delay;  $\pi_y$  – the end of the second pulse;  $del_2$  – the end of

152 the second delay. The first column shows the initial operators. The first, second, third and fourth subsections represent the

153 amplitudes with the initial operators  $I_{z1}$ ,  $I_{z2}$ ,  $2I_{x1}I_{y2}$ ,  $2I_{y1}I_{x2}$ , respectively. The simulated parameters were as in in Figure S6b and

154 Figure 5b in the main text.

| Op              | $I_{z1}$ |         |         |         | $I_{z2}$ |         |         |         | $2I_{x1}I_{y2}$ |         |         |         | $2I_{y1}I_{x2}$ |         |         |         |       |
|-----------------|----------|---------|---------|---------|----------|---------|---------|---------|-----------------|---------|---------|---------|-----------------|---------|---------|---------|-------|
|                 | $\pi_x$  | $del_1$ | $\pi_y$ | $del_2$ | $\pi_x$  | $del_1$ | $\pi_y$ | $del_2$ | $\pi_x$         | $del_1$ | $\pi_y$ | $del_2$ | $\pi_x$         | $del_1$ | $\pi_y$ | $del_2$ |       |
| $I_{z1}$        | -        | 0.98    | 0.97    | -       | 0.98     | 0.97    | -       | 0.98    | 0.01            | 0.03    | 0.01    | 0.03    | 0.08            | 0.16    | -       | 0.16    | -0.16 |
| $I_{z2}$        | 0.01     | 0.03    | 0.01    | 0.03    | -        | 0.98    | 0.97    | -       | 0.98            | 0.97    | -       | 0.98    | 0.16            | 0.16    | 0.08    | 0.16    | 0.08  |
| $2I_{x1}I_{y2}$ | -        | 0.08    | 0.16    | 0.16    | 0.16     | -       | 0.16    | 0.08    | -0.16           | -       | 0.98    | 0.97    | -               | 0.98    | 0.97    | 0.01    | 0.03  |
| $2I_{y1}I_{x2}$ | -        | 0.16    | -       | -       | -        | 0.08    | 0.16    | 0.16    | 0.16            | 0.01    | 0.03    | 0.01    | 0.03            | 0.98    | 0.97    | 0.98    | 0.97  |

155

156 Unlike the  $IS$  spin system, all 64 paths have nonzero amplitudes via which the signal is

157 transferred from homonuclear operator  $I_{z1}$  to operator  $I_{z2}$  during the first two rotor periods of RFDR.

158 These 64 paths can be divided into four groups.

159 The first group contains eight paths with combinations of  $I_{z1}$ ,  $I_{z2}$  operators only. For example, the  
 160 path  $I_{z1} \xrightarrow{\pi_x} I_{z1} \xrightarrow{del_1} I_{z1} \xrightarrow{\pi_y} I_{z1} \xrightarrow{del_2} I_{z2}$  has 0.02564 amplitude, whereas the path  $I_{z1}$   
 161  $\xrightarrow{\pi_x} I_{z2} \xrightarrow{del_1} I_{z2} \xrightarrow{\pi_y} I_{z2} \xrightarrow{del_2} I_{z2}$  has -0.01283092 amplitude. The total amplitude of this group is 0.02561578.

162 The second group contains 24 paths where each of the paths contains one of the operators  $2I_{x1}I_{y2}$   
 163 or  $2I_{y1}I_{x2}$ . For example, the path  $I_{z1} \xrightarrow{\pi_x} I_{z1} \xrightarrow{del_1} I_{z1} \xrightarrow{\pi_y} 2I_{x1}I_{y2} \xrightarrow{del_2} I_{z2}$  has -0.02566144 amplitude,  
 164 whereas the path  $I_{z1} \xrightarrow{\pi_x} I_{z1} \xrightarrow{del_1} 2I_{x1}I_{y2} \xrightarrow{\pi_y} I_{z2} \xrightarrow{del_2} I_{z2}$  has 0.01285409 amplitude. The total amplitude of  
 165 this group is -0.03786813.

166 The third group contains 24 paths where each of the paths contains two of the operators  $2I_{x1}I_{y2}$   
 167 or  $2I_{y1}I_{x2}$ . For example, the path  $I_{z1} \xrightarrow{\pi_x} 2I_{y1}I_{x2} \xrightarrow{del_1} 2I_{y1}I_{x2} \xrightarrow{\pi_y} I_{z2} \xrightarrow{del_2} I_{z2}$  has 0.025925 amplitude,  
 168 whereas the path  $I_{z1} \xrightarrow{\pi_x} 2I_{y1}I_{x2} \xrightarrow{del_1} I_{z2} \xrightarrow{\pi_y} 2I_{y1}I_{x2} \xrightarrow{del_2} I_{z2}$  has -0.00073 amplitude. The total amplitude of  
 169 this group is 0.086262.

170 The fourth group contains eight paths where each of the paths contains three instances of the  
 171 operators  $2I_{x1}I_{y2}$ ,  $2I_{y1}I_{x2}$ . For example, the path  $I_{z1} \xrightarrow{\pi_x} 2I_{y1}I_{x2} \xrightarrow{del_1} 2I_{y1}I_{x2} \xrightarrow{\pi_y} 2I_{y1}I_{x2} \xrightarrow{del_2} I_{z2}$  has -  
 172 0.02566 amplitude, whereas the path  $I_{z1} \xrightarrow{\pi_x} 2I_{x1}I_{y2} \xrightarrow{del_1} 2I_{x1}I_{y2} \xrightarrow{\pi_y} 2I_{x1}I_{y2} \xrightarrow{del_2} I_{z2}$  has 0.012854  
 173 amplitude. The total amplitude of this group is -0.01262.

174 The total amplitude of all four groups at the time point  $2T_R$  is 0.061, which is the same as for the  
 175 heteronuclear  $IS$  spin system.

## 176 **RFDR Phase Cycling**

177 In this section we show that under the specific conditions of two spins and no chemical shift  
 178 offsets, there is zero RFDR transfer between operators  $I_{z1}$  and  $I_{z2}$  at  $t_{mix}=nT_R$  ( $n=1,2,3,\dots$ ) when XX phase  
 179 cycling is used. The measured operator at this time is described with the Eq.:

$$\langle I_{z2} \rangle(T_R) = Tr\{I_{z2}U(T_R)I_{z1}U^{-1}(T_R)\}. \quad \text{Eq. (S2)}$$

180 We take into account the dipolar interaction as well as the rf-field during the  $\pi$ -pulse. Then the unitary  
181 operator,  $U(T_R)$  is written as follow:

$$182 \quad U(T_R) = U_2U_1 \quad \text{Eq. (S3)}$$

$$183 \quad U_1 = \hat{T} \exp \left\{ \int_0^{t_p} dt [\omega_{D,12}(t)(3I_{z1}I_{z2} - \bar{I}_1\bar{I}_2) + \omega_{rf}(I_{x1} + I_{x2})] \right\}, \quad \text{Eq. (S3a)}$$

$$184 \quad U_2 = \hat{T} \exp \left\{ \int_{t_p}^{T_R} dt \omega_{D,12}(t)(3I_{z1}I_{z2} - \bar{I}_1\bar{I}_2) \right\}. \quad \text{Eq. (S3b)}$$

185 where  $\hat{T}$  is a Dyson operator and  $\omega_{D,12}(t)$  is a periodic dipolar time dependent function(Olejniczak et al.,  
186 1984) between spins  $I_1$  and  $I_2$ . Firstly, we can simplify Eq. S3 omitting the scalar product,  $\bar{I}_1\bar{I}_2$ , since it  
187 commutes with other parts of the Hamiltonian:

$$[\bar{I}_1\bar{I}_2, I_{z1}I_{z2}] = [\bar{I}_1\bar{I}_2, I_{x1} + I_{x2}] = 0, \quad \text{Eq. (S4)}$$

188 and the dipolar function is periodic  $-\int_0^{T_R} dt \omega_{D,12}(t)\bar{I}_1\bar{I}_2 = 0$ . Eq. S3a-b can be written as follow:

$$189 \quad U_1 = \hat{T} \exp \left\{ \int_0^{t_p} dt [\omega_{D,12}(t)3I_{z1}I_{z2} + \omega_{rf}(I_{x1} + I_{x2})] \right\}, \quad \text{Eq. (S5a)}$$

$$190 \quad U_2 = \hat{T} \exp \left\{ \int_{t_p}^{T_R} dt \omega_{D,12}(t)3I_{z1}I_{z2} \right\}. \quad \text{Eq. (S5b)}$$

191 The next step is the rotation of all the operators by  $90^\circ$  around axis -y:

$$I_{z1}, I_{z2}, I_{z1}I_{z2}, (I_{x1} + I_{x2}) \xrightarrow{90-y} -I_{x1}, -I_{x2}, I_{x1}I_{x2}, (I_{z1} + I_{z2}). \quad \text{Eq. (S6)}$$

192 Substituting Eq. (S6) into Eqs. S2 and Eq. (S5a-b), the modified Eq. (S2) is:

$$\langle I_{z2} \rangle(T_R) = Tr\{I_{x2}U_2U_1I_{x1}U_1^{-1}U_2^{-1}\}, \quad \text{Eq. (S7)}$$

193 whereas the modified Eq. (S5a-b) is:

$$194 \quad U_1 = \hat{T} \exp \left\{ \int_0^{t_p} dt [\omega_{D,12}(t)3I_{x1}I_{x2} + \omega_{rf}(I_{z1} + I_{z2})] \right\} \quad \text{Eq. (S8a)}$$

195  $U_2 = \hat{T} \exp \left\{ \int_{t_p}^{T_R} dt \omega_{D,12}(t) 3I_{x1} I_{x2} \right\}, \quad \text{Eq. (S8b)}$

196 The operators in Eq. (S8a-b) can be rewritten with fictitious spin 1/2 operator formalism (Vega, 1978):

$$\begin{aligned} 2I_{x1} I_{x2} &= I_x^{(2,3)} + I_x^{(1,4)}, \\ (I_{z1} + I_{z2}) &= 2I_z^{(1,4)}. \end{aligned} \quad \text{Eq. (S9)}$$

197 Therefore, Eqs. (S8a-b) can be written as follow:

198  $U_1 = \hat{T} \exp \left\{ \int_0^{t_p} dt \left[ \omega_{D,12}(t) 3 \left( I_x^{(1,4)} + I_x^{(2,3)} \right) + \omega_{rf} 2I_z^{(1,4)} \right] \right\} \quad \text{Eq. (S10a)}$

199  $U_2 = \hat{T} \exp \left\{ \int_{t_p}^{T_R} dt \omega_{D,12}(t) 3 \left( I_x^{(1,4)} + I_x^{(2,3)} \right) \right\}. \quad \text{Eq. (S10b)}$

200 Since the operator  $I_x^{(2,3)}$  commutes with other operators and the dipolar function is periodic –

201  $\int_0^{T_R} dt \omega_{D,12}(t) I_x^{(2,3)} = 0$  – the Eqs. (S7) and (S10a-b) can be rewritten as:

202  $\langle I_{z2} \rangle (T_R) = \text{Tr} \left\{ I_{x2} U_2^{(1,4)} U_1^{(1,4)} I_{x1} \left( U_2^{(1,4)} U_1^{(1,4)} \right)^{-1} \right\}, \quad \text{Eq. (S11)}$

203  $U_1^{(1,4)} = \hat{T} \exp \left\{ \int_0^{t_p} dt \left[ \omega_{D,12}(t) 3I_x^{(1,4)} + \omega_{rf} 2I_z^{(1,4)} \right] \right\}, \quad \text{Eq. (S12a)}$

204  $U_2^{(1,4)} = \hat{T} \exp \left\{ \int_{t_p}^{T_R} dt \omega_{D,12}(t) 3I_x^{(1,4)} \right\}. \quad \text{Eq. (S12b)}$

205 On the basis of the fictitious spin 1/2 operator formalism (Vega, 1978), the next properties always hold:

$$\begin{aligned} 2I_{xj} I_x^{(1,4)} 2I_{xj} &= I_x^{(2,3)}, \\ 2I_{xj} I_z^{(1,4)} 2I_{xj} &= -I_z^{(2,3)}, \quad j = 1, 2. \end{aligned} \quad \text{Eq. (S13)}$$

206 On the basis of these properties Eqs. (S11) and (S12) are:

207  $\langle I_{z2} \rangle (T_R) = \text{Tr} \left\{ I_{x2} I_{x1} \check{U}_2^{(2,3)} \check{U}_1^{(2,3)} \left( U_2^{(1,4)} U_1^{(1,4)} \right)^{-1} \right\}, \quad \text{Eq. (S14)}$

208  $\check{U}_1^{(2,3)} = \hat{T} \exp \left\{ \int_0^{t_p} dt \left[ \omega_{D,12}(t) 3I_x^{(2,3)} - \omega_{rf} 2I_z^{(2,3)} \right] \right\}, \quad \text{Eq. (S15a)}$

209  $\check{U}_2^{(2,3)} = \hat{T} \exp \left\{ \int_{t_p}^{T_R} dt \omega_{D,12}(t) 3I_x^{(2,3)} \right\}. \quad \text{Eq. (S15b)}$

210 On the basis of Eq. (S9) the product of  $I_{x2}I_{x1}$  can be rewritten and therefore Eq. (S14) is:

$$\begin{aligned}
 211 \quad \langle I_{zz} \rangle (T_R) &= 0.5 \text{Tr} \left\{ \left( I_x^{(2,3)} + I_x^{(1,4)} \right) \left( \tilde{U}_2^{(2,3)} \tilde{U}_1^{(2,3)} \right) \left( U_2^{(1,4)} U_1^{(1,4)} \right)^{-1} \right\} = \\
 212 \quad &= 0.5 \text{Tr} \left\{ I_x^{(2,3)} \tilde{U}_2^{(2,3)} \tilde{U}_1^{(2,3)} \right\} + 0.5 \text{Tr} \left\{ I_x^{(1,4)} \left( U_2^{(1,4)} U_1^{(1,4)} \right)^{-1} \right\}. \quad \text{Eq. (S16)}
 \end{aligned}$$

213 The next step is to use the properties of fictitious spin  $\frac{1}{2}$  operator formalism (Eq. S13) to arrive at:

$$214 \quad \langle I_{zz} \rangle (T_R) = 0.5 \text{Tr} \left\{ I_x^{(2,3)} \tilde{U}_2^{(2,3)} \tilde{U}_1^{(2,3)} \right\} + 0.5 \text{Tr} \left\{ I_x^{(2,3)} \left( \tilde{U}_2^{(2,3)} \tilde{U}_1^{(2,3)} \right)^{-1} \right\}. \quad \text{Eq. (S17)}$$

215 The last step is to use the property:

$$\begin{aligned}
 & -2I_y^{(2,3)} I_x^{(2,3)} 2I_y^{(2,3)} = I_x^{(2,3)}, \\
 & -2I_y^{(2,3)} I_z^{(2,3)} 2I_y^{(2,3)} = I_z^{(2,3)}.
 \end{aligned} \quad \text{Eq. (S18)}$$

216 Substituting Eq. (S18) into Eq. (S115a-b), then the modified Eq. (S15a-b) into Eq. (S17) and considering

217 that  $2I_y^{(2,3)} 2I_y^{(2,3)} = 1^{(2,3)}$  and  $\left[ I_x^{(2,3)}, \tilde{U}_2^{(2,3)} \right] = 0$ , the transferred signal is:

$$218 \quad \langle I_{zz} \rangle (T_R) = -0.5 \text{Tr} \left\{ I_x^{(2,3)} \left( \tilde{U}_2^{(2,3)} \tilde{U}_1^{(2,3)} \right)^{-1} \right\} + 0.5 \text{Tr} \left\{ I_x^{(2,3)} \left( \tilde{U}_2^{(2,3)} \tilde{U}_1^{(2,3)} \right)^{-1} \right\} = 0. \quad \text{Eq. (S19)}$$

219 Since the transferred signal is zero at the mixing time of one rotor period, it is always zero at integer  
 220 multiples of rotor periods.

221

222 Bak, M., Rasmussen, J. T., and Nielsen, N. C.: SIMPSON: A General Simulation Program for Solid-  
 223 State NMR Spectroscopy, *J. Magn. Reson. San Diego Calif* 1997, 1–35,  
 224 <https://doi.org/10.1006/jmre.2000.2179>, 2000.

225 Fung, B. M., Khitritin, A. K., and Ermolaev, K.: An Improved Broadband Decoupling Sequence for Liquid  
 226 Crystals and Solids, *J. Magn. Reson.*, 142, 97–101, <https://doi.org/10.1006/jmre.1999.1896>, 2000.

227 Gullion, T., Baker, D. B., and Conradi, M. S.: New, compensated Carr-Purcell sequences, *J. Magn.*  
 228 *Reson.* 1969, 89, 479–484, [https://doi.org/10.1016/0022-2364\(90\)90331-3](https://doi.org/10.1016/0022-2364(90)90331-3), 1990.

229 Olejniczak, E. T., Vega, S., and Griffin, R. G.: Multiple pulse NMR in rotating solids, *J. Chem. Phys.*, 81,  
 230 4804–4817, <https://doi.org/10.1063/1.447506>, 1984.

- 231 Thakur, R. S., Kurur, N. D., and Madhu, P. K.: Swept-frequency two-pulse phase modulation for  
232 heteronuclear dipolar decoupling in solid-state NMR, *Chem. Phys. Lett.*, 426, 459–463,  
233 <https://doi.org/10.1016/j.cplett.2006.06.007>, 2006.
- 234 Vega, S.: Fictitious spin 1/2 operator formalism for multiple quantum NMR, *J. Chem. Phys.*, 68, 5518–  
235 5527, <https://doi.org/10.1063/1.435679>, 1978.
- 236
- 237
